# Supplementary material for: Genome-Wide Profiling Reveals HPV Integration Pattern and Activated Carcinogenic Pathways in Penile Squamous Cell Carcinoma
Source: MDPI journal article supplement (doi:10.3390/cancers13236104), 2021-12-03
Supplement: s1 [file s1]

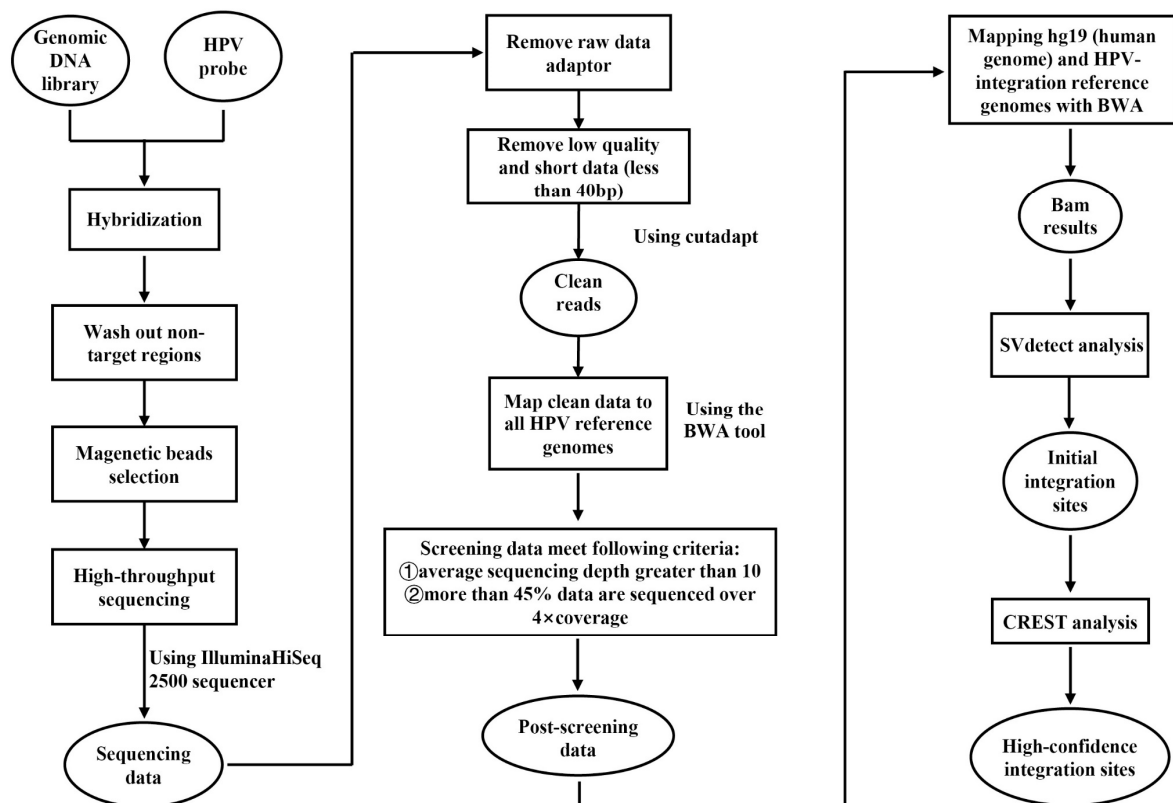

**Supplementary Figure S1 - The pipeline of bioinformatic analysis.** The bioinformatic process from high-throughput viral integration detection to the identification of integration breakpoints.

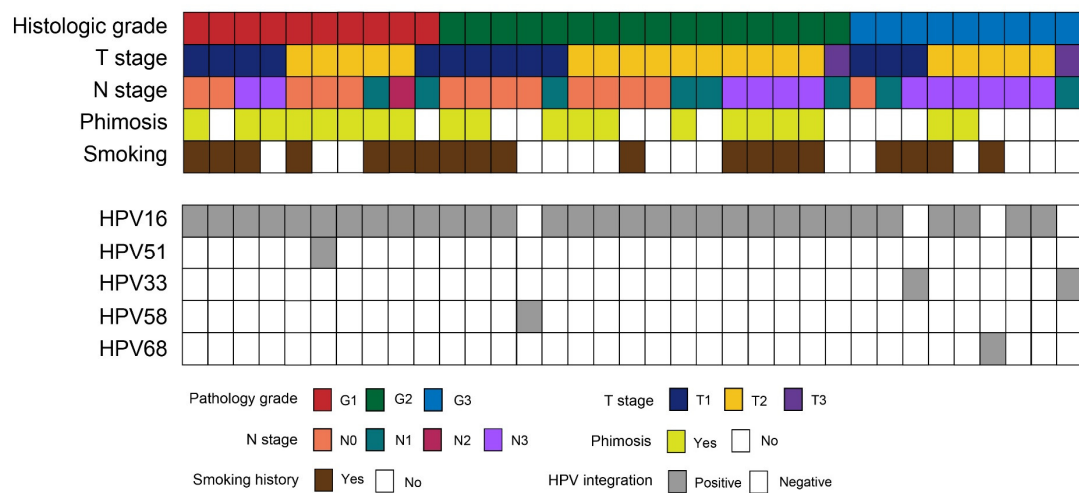

**Supplementary Figure S2 - Integrated HPV subtypes and clinicopathological/epidemiological characteristics of 35 PSCC samples.** Each vertical track represents an individual. Top: The main clinicopathological/epidemiological data are sorted by histologic grade; bottom: HPV integration status of different HPV subtypes in patients.

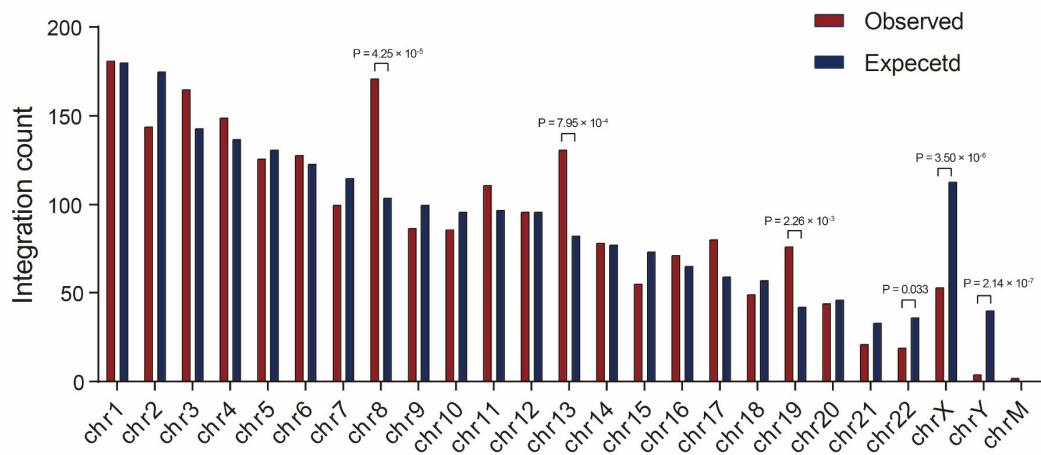

**Supplementary Figure S3 - The distribution of integration breakpoints in human chromosomes.** Observed (red) and expected (blue) numbers of breakpoints in human chromosomes were compared. Chr, chromosome. *P* values were calculated by the chi-squared tests.

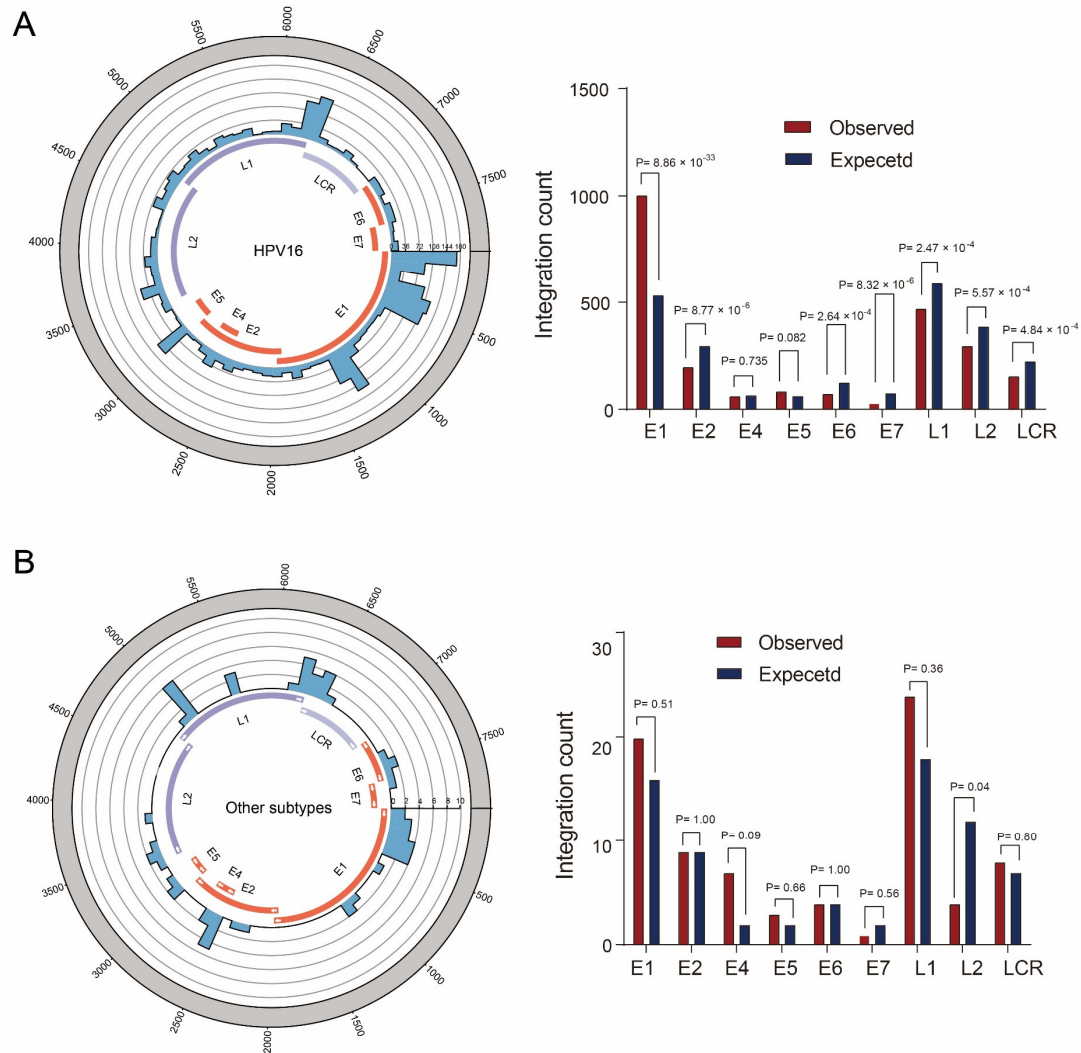

**Supplementary Figure S4 - The integration breakpoints in genomes of the HPV 16 and other HPV subtypes. (A)** The distribution of integration breakpoints in the HPV16 genome. **(B)** The distribution of integration breakpoints in the genomes of other HPV subtypes. Observed (red) and expected (blue) numbers of breakpoints were compared. *P* values were calculated by the chi-squared tests.

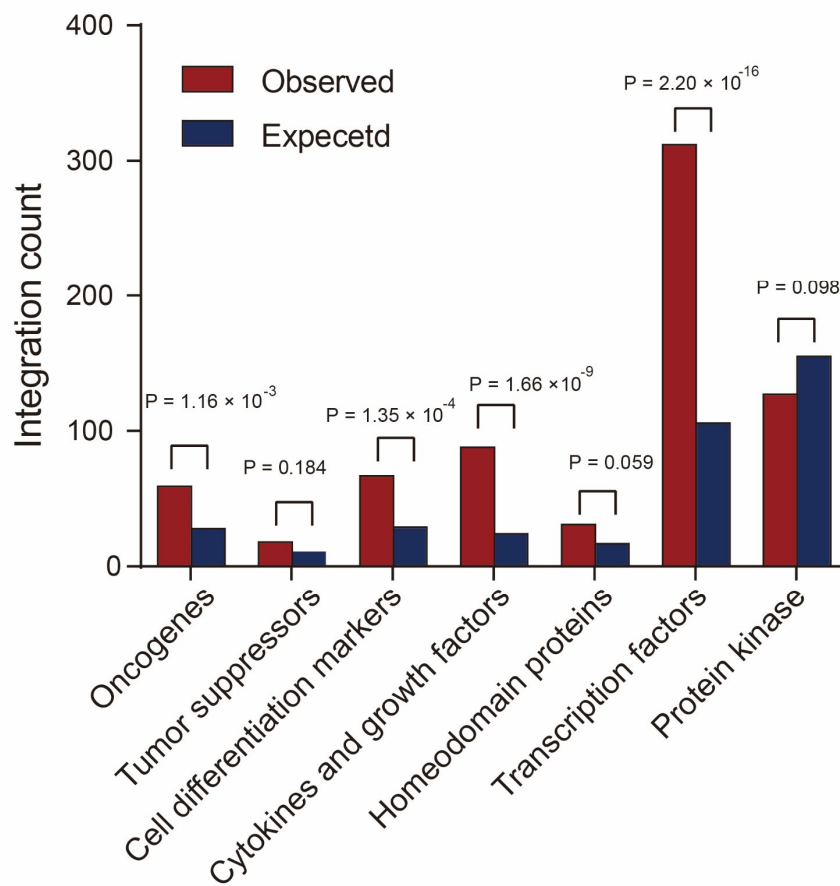

**Supplementary Figure S5 - Families of integration-affected genes.** Integration-affected genes were classified into different families by Gene Set Enrichment Analysis. *P* values were calculated by the chi-squared tests.



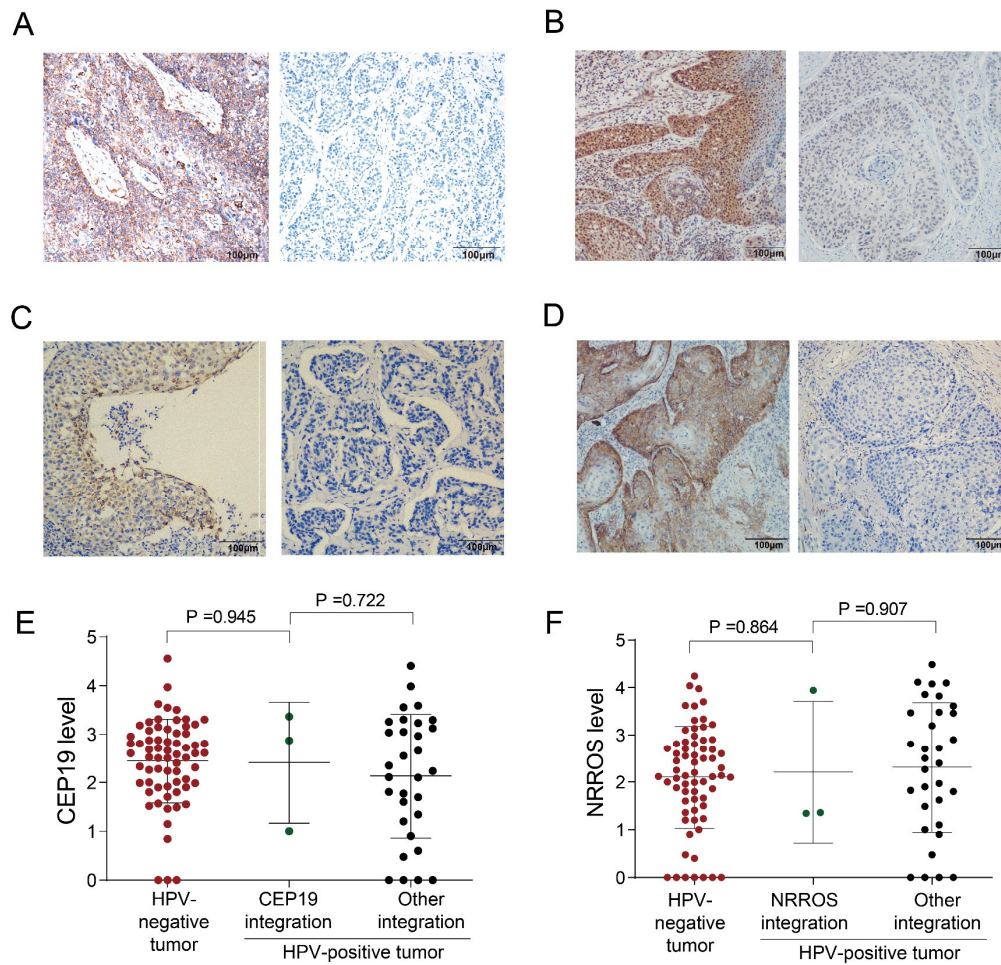

### Supplementary Figure S7 - The expression of integration hotspot genes in PSCC.

(A-D) Representative IHC images (100×) for CADM2 (A), KLF5 (B), CEP19 (C) and NRROS (D) expression (left: positive sample; right: negative sample); (E) CEP19 expression, represented by  $\log_2(\text{integrated optical density} + 1)$  value, in HPV-negative tumors, HPV-positive tumors with CEP19 integration and HPV-positive tumors with other integration. (F) NRROS expression in HPV-negative tumors, HPV-positive tumors with NRROS integration and HPV-positive tumors with other integration. The significance of the difference was analyzed by ANOVA. Statistical significance was set as  $P < 0.05$ .

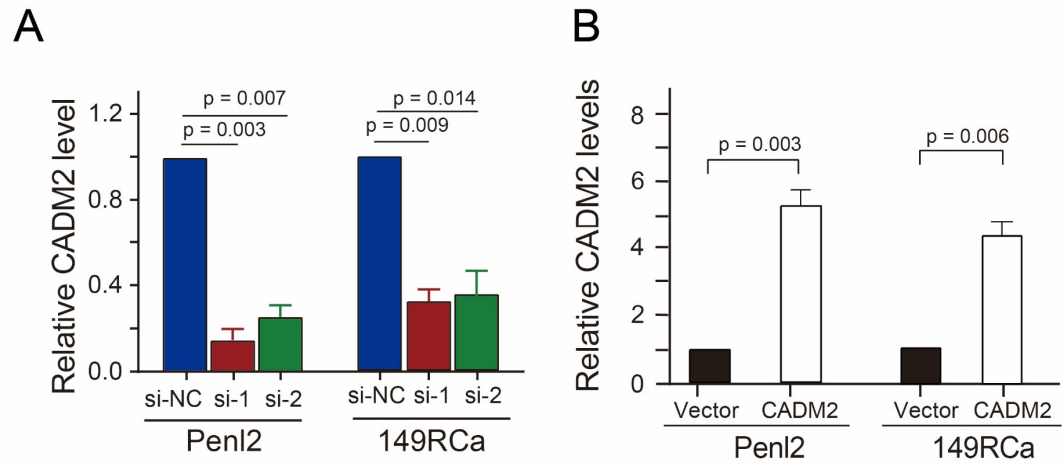

**Supplementary Figure S8 - The expression levels of CADM2 in PSCC cell lines.**

Relative CADM2 levels in PSCC cell lines with CADM2-knockdown (**A**) or CADM2-overexpression (**B**), examined by qPCR analysis. *P* value was calculated via Student's *t* test.



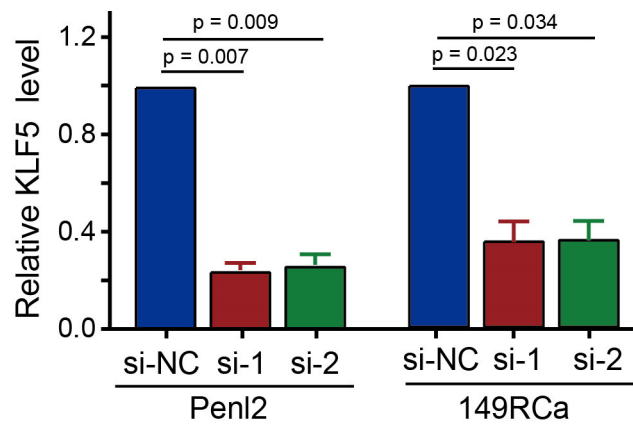

**Supplementary Figure S9 - The expression levels of KLF5 in PSCC cell lines.**

Relative KLF5 levels in PSCC cell lines with KLF5-knockdown or KLF5-overexpression, examined by qPCR assay. *P* value was calculated via Student's *t* test.
